# Supplementary material for: HIV Progression Perturbs the Balance of the Cell-Mediated and Anti-Inflammatory Adaptive and Innate Mycobacterial Immune Response
Source: PubMed Central journal article supplement (PMC4781991; doi:10.1155/2016/1478340), 2016-03-02

Supplemental Figure 1

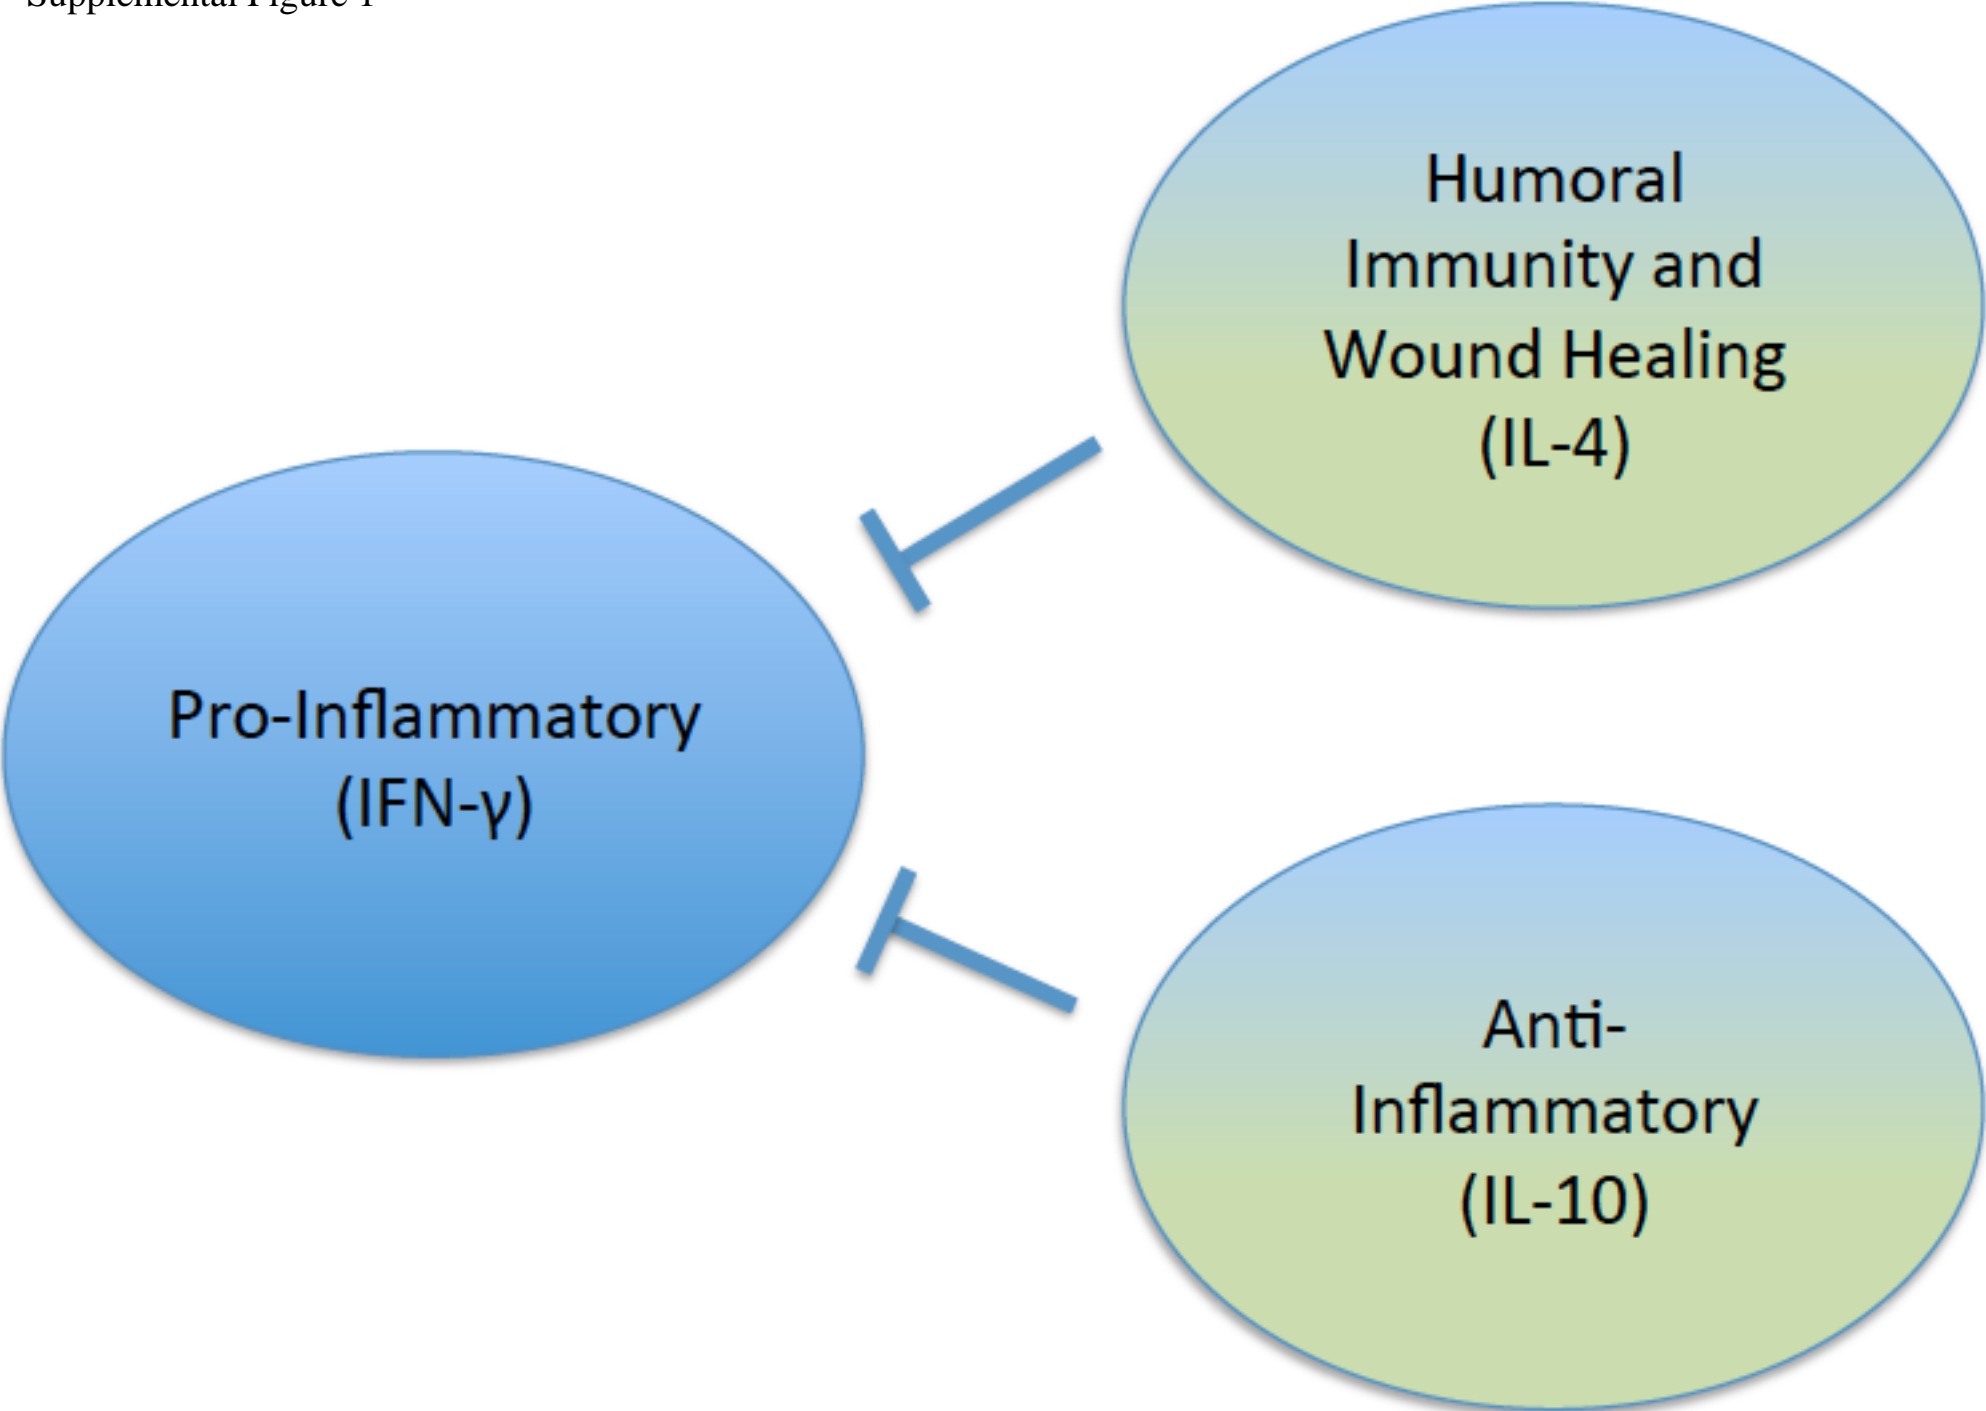

Supplemental Figure 2

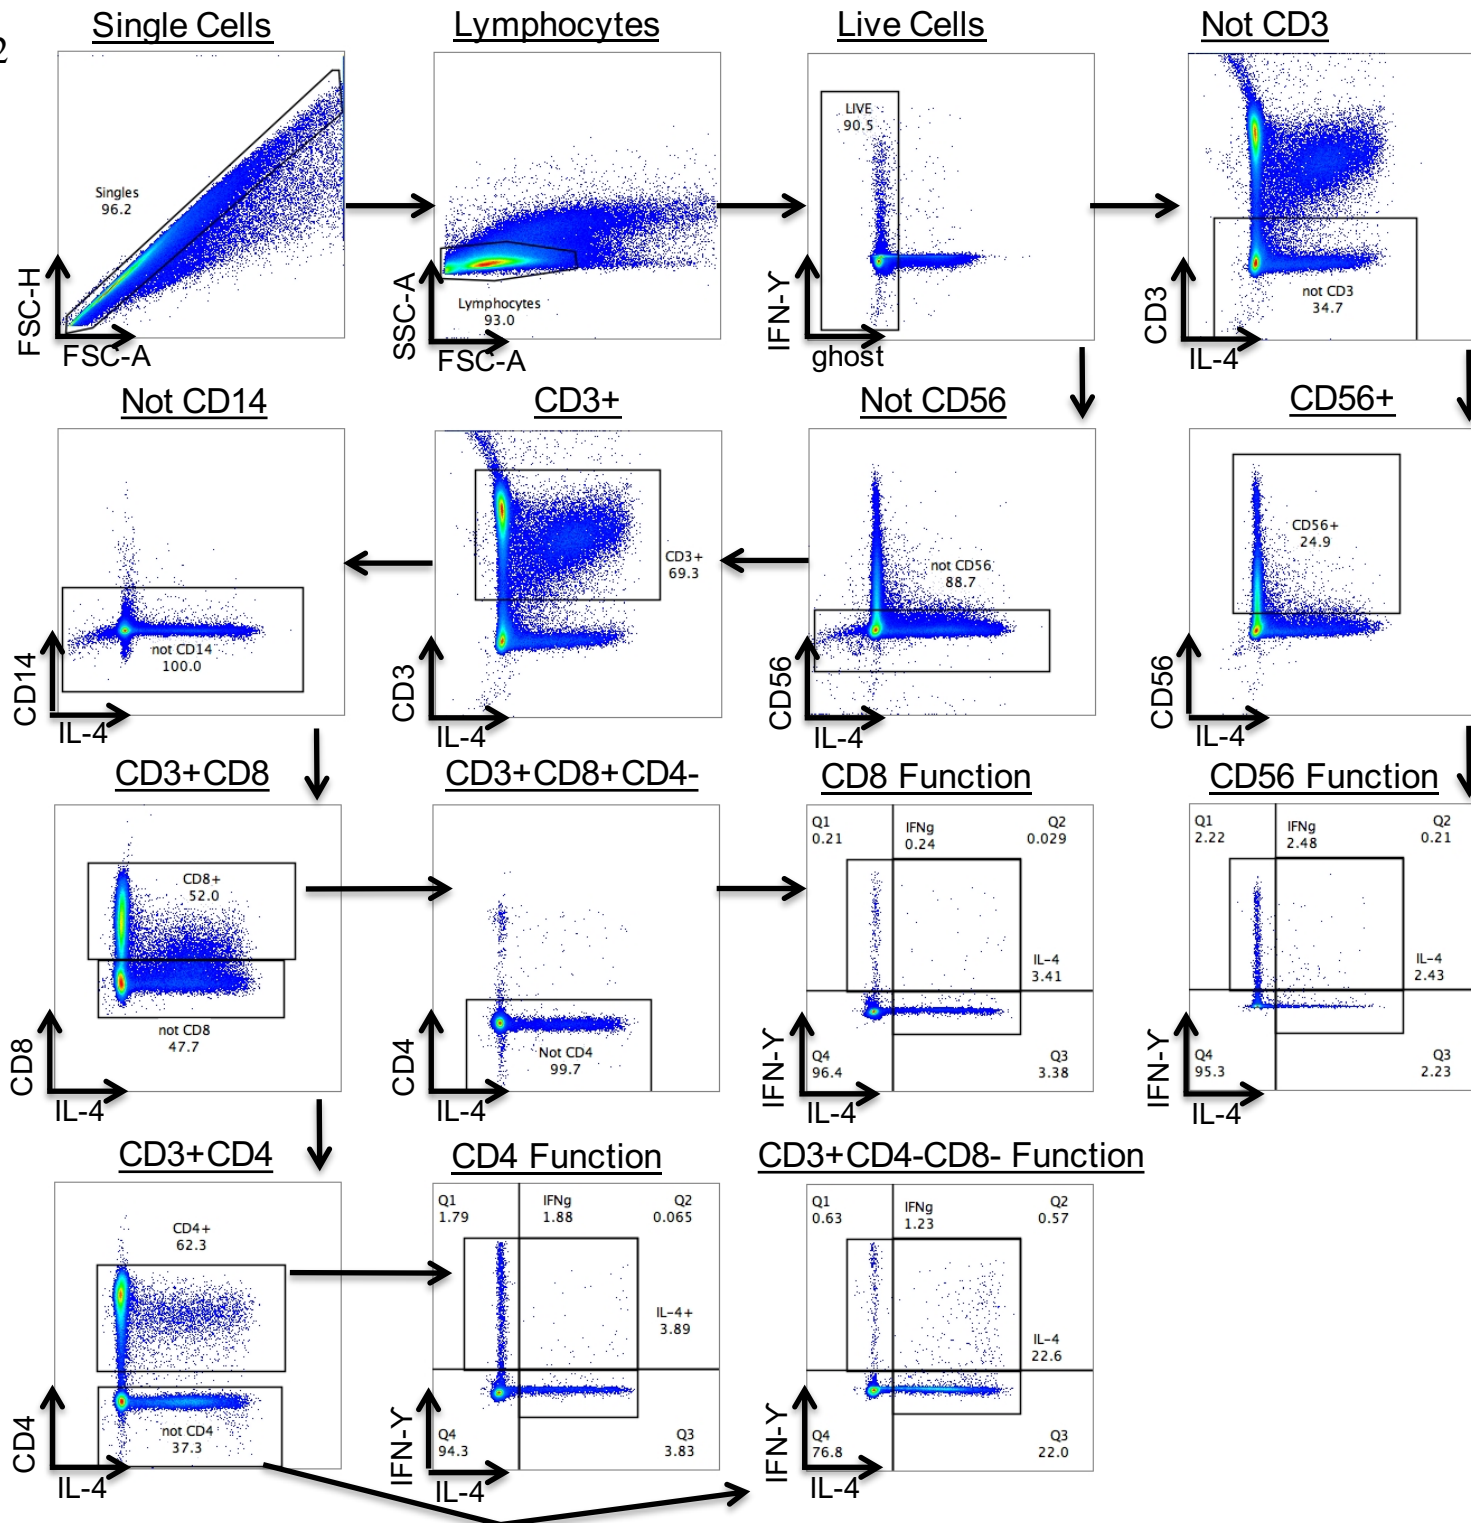

Supplement: 1478340.f1.pdf [file 1478340.f1.pdf]
